1 Alzheimer's disease-relevant tau modifications selectively impact  
2 neurodegeneration and mitophagy in a novel *C. elegans* single-copy  
3 transgenic model

4 Sanjib Guha<sup>1</sup>, Sarah Fischer<sup>2</sup>, Gail VW Johnson<sup>1,\*</sup> and Keith Nehrke<sup>2,\*</sup>

5 <sup>1</sup>University of Rochester, Department of Anesthesiology & Perioperative Medicine,  
6 Rochester, NY

7 <sup>2</sup>University of Rochester, Department of Medicine, Nephrology Division, Rochester, NY

8

9 Author e-mail addresses:

10 [Sanjib\\_Guha@urmc.rochester.edu](mailto:Sanjib_Guha@urmc.rochester.edu)

11 [sfische8@u.rochester.edu](mailto:sfische8@u.rochester.edu)

12

13 \*Co-corresponding authors:

14 Keith Nehrke, Department of Medicine, Box 675, University of Rochester Medical Center,  
15 601 Elmwood Avenue, Rochester, NY 14642, USA. Phone: (585) 275-7020; Fax: (585)  
16 442-9201; E-mail: [Keith\\_Nehrke@urmc.rochester.edu](mailto:Keith_Nehrke@urmc.rochester.edu)

17 Gail VW Johnson, Department of Anesthesiology & Perioperative Medicine, Box 604,  
18 University of Rochester Medical Center, 601 Elmwood Avenue, Rochester, NY 14642,  
19 USA. Phone: (585) 276-3740; Fax: (585) 273-2652; E-mail:

20 [Gail\\_Johnsonvoll@urmc.rochester.edu](mailto:Gail_Johnsonvoll@urmc.rochester.edu)

21 **ABSTRACT**

22 **Background:** A defining pathological hallmark of the progressive neurodegenerative  
23 disorder Alzheimer's disease (AD) is the accumulation of misfolded tau with abnormal  
24 post-translational modifications (PTMs). These include phosphorylation at Threonine 231  
25 (T231) and acetylation at Lysine 274 (K274) and at Lysine 281 (K281). Although tau is  
26 recognized to play a central role in pathogenesis of AD, the precise mechanisms by which  
27 these abnormal PTMs contribute to the neural toxicity of tau is unclear.

28 **Methods:** Human 0N4R tau (wild type) was expressed in touch receptor neurons of the  
29 genetic model organism *C. elegans* through single-copy gene insertion. Defined  
30 mutations were then introduced into the single-copy tau transgene through CRISPR-Cas9  
31 genome editing. These mutations included T231E and T231A, to mimic phosphorylation  
32 and phospho-ablation of a commonly observed pathological epitope, respectively, and  
33 K274/281Q, to mimic disease-associated lysine acetylation. Stereotypical touch response  
34 assays were used to assess behavioral defects in the transgenic strains as a function of  
35 age, and genetically-encoded fluorescent biosensors were used to measure the  
36 morphological dynamics and turnover of touch neuron mitochondria.

37 **Results:** Unlike existing tau overexpression models, *C. elegans* single-copy expression  
38 of tau did not elicit overt pathological phenotypes at baseline. However, strains  
39 expressing disease associated PTM-mimetics (T231E and K274/281Q) exhibited  
40 reduced touch sensation and morphological abnormalities that increased with age. In

41 addition, the PTM-mimetic mutants lacked the ability to engage mitophagy in response to  
42 mitochondrial stress.

43 **Conclusions:** Limiting the expression of tau results in a genetic model where  
44 pathological modifications and age result in evolving phenotypes, which may more closely  
45 resemble the normal progression of AD. The finding that disease-associated PTMs  
46 suppress compensatory responses to mitochondrial stress provides a new perspective  
47 into the pathogenic mechanisms underlying AD.

48 **Keywords:** Alzheimer's disease, *C. elegans*, tau, neurodegeneration, post-translational  
49 modifications

## 50 **BACKGROUND**

51 Alzheimer's disease (AD) is the most common degenerative brain disease in the aged  
52 population. It is characterized by the progressive decline of cognition and memory, as  
53 well as changes in behavior and personality (1). One of the key pathological hallmarks of  
54 AD is neurofibrillary tangles (NFTs), which are primarily composed of abnormally modified  
55 tau (2). Tau isolated from AD brain exhibits a number of posttranslational modifications  
56 (PTMs); including increases in phosphorylation and acetylation at specific residues (3, 4).  
57 While it is clear that tau is central to AD pathogenesis, the concept of large insoluble NFTs  
58 in AD and other tauopathies being the principle mediators of neuronal toxicity has been  
59 gradually abandoned (5). Instead, toxicity appears to result from soluble or oligomeric  
60 forms of tau that exhibit increased, disease-associated phosphorylation and acetylation  
61 at specific residues altering its turnover and function (6, 7).

62 Studies to date have provided evidence that phosphorylation of tau at Threonine 231  
63 (T231) occurs early in the evolution of tau pathology; for example, increased staining for  
64 this epitope is observed in “pre-tangle” neurons (8). Further, increased phospho-T231 tau  
65 was observed in neurons differentiated from iPSCs of sporadic AD cases (9).  
66 Phosphorylation of tau at specific sites causes significant changes in tau structure (10,  
67 11) and impairs microtubule binding (12, 13). In addition, phosphorylation of tau at T231  
68 precedes the formation of tau oligomers (7, 14), which likely contribute to tau toxicity (15).

69 As with phosphorylation, abnormal tau acetylation also likely plays a critical role in  
70 tauopathies (16-18). There are data indicating that acetylation inhibits binding of tau to  
71 microtubules, enhances tau accumulation by preventing degradation and promotes the  
72 aggregation of tau in neurons (19-21). In particular, increased expression of tau  
73 acetylated at K274 and K281 appears to result in mislocalization of tau, destabilization of  
74 the cytoskeleton in the axon initial segment, and synaptic dysfunction (20, 22). Altogether,  
75 these experiments suggest a potential role for tau acetylated at K274/281 in AD  
76 pathogenesis. While these studies indicate that modifications of human tau at specific  
77 residues play a pivotal role in mediating tau dysfunction, the precise mechanism by which  
78 specific tau PTMs contribute to the toxicity of soluble tau forms is still unclear.

79 Mitochondrial dysfunction is a characteristic of many neurodegenerative diseases  
80 including AD (23, 24), and over expression of human full length tau or mutant human tau  
81 contributes to mitochondrial dysfunction in AD animal models (25, 26). Mitochondria play  
82 a complex role in the cell - they not only generate most of the energy needed to support  
83 the various neuronal functions (27), but also are mediators of homeostatic processes that

84 are necessary for neuronal health (28). Although it is likely that tau pathology affects  
85 mitochondrial biology, the underlying mechanisms are not well understood, nor it is known  
86 how tau modified at disease relevant sites differ from its wild type form in causing  
87 mitochondrial abnormalities leading to neurodegeneration.

88 To understand the role of tau in the context of AD *per se*, tau transgenic models have  
89 been developed in *C. elegans* (29-31), *D. melanogaster* (32, 33) and mice (34, 35) by  
90 overexpression of human wild-type full-length tau (25), tau with mutations that result in  
91 frontotemporal lobar degeneration (FTLD) (35), or a tau with a risk factor mutation for  
92 AD FTLD such as A152T (31). Studies utilizing these transgenic animals have made  
93 important contributions to the field, but over-expression of tau can potentially lead to  
94 synthetic toxic or gain-of-function phenotypes, and this caveat must always be kept in  
95 mind when extrapolating results to the human disease.

96 Here, we attempted to circumvent the limitations associated with tau overexpression by  
97 taking advantage of single-copy genome insertion methodology in the genetic model  
98 organism *C. elegans* (36). Using this methodology, human tau was expressed in a defined  
99 set of mechanosensory neurons that mediate a stereotypical behavioral output (37). To  
100 interrogate the effects of pathologic PTMs in this system, CRISPR-Cas9 gene editing was  
101 used to introduce AD-associated phosphorylation mimicking (T→E) or a non-  
102 phosphorylatable (T→A) mutation at the T231 position of the wild-type tau isoform, or  
103 alternatively acetylation mimicking (K→Q) mutations at the K274 and K281 positions of  
104 the wild type tau isoform. A combination of behavioral assays and fluorescent biosensors  
105 were used to study the impact of tau and mutant tau expression on neuronal morphology

106 and mitochondrial phenotypes, with the advantage of being able to assess age-  
107 dependence in a relatively short time frame (38, 39).

108 Our results clearly demonstrate that wild-type tau has little effect at baseline, but that AD-  
109 relevant tau PTMs selectively impact sensory neuron function and morphology and  
110 mitochondrial handling. Moreover, age exacerbates defects in one of the tau mutant  
111 strains, but not the others. This leads us to conclude that using our single copy tau model  
112 confers the ability to discern between the pathological consequences of individual tau  
113 mutants with unprecedented precision. Surprisingly, AD-associated tau mutants also  
114 completely suppressed paraquat-induced mitophagy, supporting the idea that  
115 pathological modifications of tau results in dysfunctional responses to stress, including  
116 perhaps the stress of aging.

## 117 **METHODS**

### 118 **Plasmid construction**

119 Briefly, pBJ1 codes for the fluorescent photo-convertible protein Dendra2 (40), cloned  
120 downstream of the *mec-7* promoter in a pFH6.II *C. elegans* expression vector (41). pBJ2  
121 adds the coding sequence for tau (0N4R) inserted downstream and in-frame with  
122 Dendra2. pBJ5 and pBJ6 are derivatives of pBJ1 and pBJ2, respectively, with the tau  
123 expression cassette sub-cloned into pCFJ151 (Addgene) to generate MosSCI inserts at  
124 the ttTi5605 loci in *C. elegans* chromosome II (42). pSKG1 contains a *mec-4* promoter  
125 driving the expression of *C. elegans* codon-optimized mito-mKeima (courtesy of Dr. C.  
126 Rongo, Rutgers University).

## 127 ***C. elegans* strain generation**

128 The wild-type background strain was Bristol-N2. Other strains used here include,  
129 KWN177 *rnyIs14* [*Pmec-4::mCherry*], KWN796 *rnyEx336* [*pSKG1* (*Pmec-4::mito-*  
130 *mKeima*), *pCFJ90* (*Pmyo-2::wCherry*), *pCl* (*pha-1+*)]. Transgenic strains for single copy  
131 gene expression were generated using MosSCI insertion (42) into ttTi5605 on  
132 Chromosome II via established protocols (36), and include the following: KWN169,  
133 *rnySi26* [*Pmec-7::Dendra2; unc-119+*] II; KWN167, *rnySi24* [*Pmec-7::Dendra2::Tau-T4;*  
134 *unc-119+*] II. Both strains were sequenced completely through the insertion site and were  
135 outcrossed at least four times to the lab N2-Bristol stock. CRISPR-Cas9 gene editing was  
136 used to introduce site-specific mutations into the *rnySi24* tau coding region via a co-  
137 CRISPR strategy and oligonucleotide-mediated HDR using purified Cas9 RNP injection  
138 (43, 44). Targeting crRNAs were from Dharmacon and were complexed to scaffolding  
139 RNAs for Cas9, with genomic recognition sites as follows:

140 Tau T231, 5'ACGGCGACTTGGGTGGAGTA3';

141 Tau K274/281, 5'GCACCAGCCGGGAGGCGGGA3'.

142 Single stranded oligonucleotide directed repair templates were:

143 Tau T231A ssODN,

144 5'GTCCCTTCCAACCCACCCACCCGGGAGCCCAAGAAGGTGGCCGTGGTCAGAG

145 CCCACCCAAGTCGCCGTCTTCCGCCAAGAGCCGCCTGCAGA3'

146 Tau T231E ssODN,

147 5'GTCCCTTCCAACCCACCCACCCGGGAGCCCAAGAAGGTGGCCGTGGTCAGAG

148 AGCCACCCAAGTCGCCGTCTTCCGCCAAGAGCCGCCTGCAGA3'

149 Tau K274/281Q ssODN,

150 5'CGGCTCCACTGAGAACCTGAAGCACCAGCCGGGAGGCGGGCAAGTGCAGATAA

151 TTAATAAGCAGCTGGATCTTAGCAACGTCCAGTCCAAGTGTGGCTCAAAGGATA3'

152 In all cases, HDR would be predicted to disrupt the PAM, but leave the coding sequence  
153 potential outside of the desired amino acid substitution intact. Repair at T231 also  
154 disrupted a Btsal site, while repair at K274/281 created a new PvuII site. These  
155 modifications could be detected via restriction analysis of genomic PCR products and  
156 were used to screen *dpy-10* co-CRISPR mutants for edits with primers:

157 Tau geno-F1, 5'-AAAGACACCACCCAGCTCTG-3'

158 Tau geno-R1, 5'TGTTGCCTAATGAGCCACAC3',

159 Following isolation of homozygous tau mutants, editing was confirmed via genomic PCR  
160 sequencing, and the mutants were crossed out of the co-CRISPR'd *dpy-10* mutant  
161 background. The final strains are KWN788 *rnySi51 [Tau-T4 (T231A) \*rnySi24] II*,  
162 KWN789 *rnySi52 [Tau-T4 (T231E) \*rnySi24] II*, KWN790 *rnySi53 [Tau-T4 (K274Q;  
163 K281Q) \*rnySi24] II*. For crossing tau MosSCI strains into various genetic backgrounds,  
164 Dendra2 fluorescent was used to guide selection of homozygous mutants, and PCR



165 genotyping was used to confirm homozygosity with primers specific to the ttTi5605 loci,  
166 including:

167 MosSCI ttTi5605-F, 5'GTTTTTGATTGCGTGCGTTA3'

168 MosSCI ttTi5605-R, 5'ACATGCTTCGTGCAAAACAG3'

169 MosSCI ttTi5605 insert-F, 5'CATCCCGGTTTCTGTCAAAT3'

170 Other strains included KWN791 *rnySi51 II*; *rnyls14*, KWN797 *rnySi26 II*; *rnyls14* KWN798  
171 *rnySi24 II*, *rnyls14*, KWN800 *rnySi52 II*; *rnyls14*, KWN801 *rnySi53 II*; *rnyls14* KWN802  
172 *rnySi26 II*; *rnyEx336* KWN803 *rnySi24 II*; *rnyEx336*, KWN804 *rnySi52 II*; *rnyEx336*,  
173 KWN805 *rnySi53 II*; *rnyEx336*, KWN806 *rnySi51 II*; *rnyEx336*.

### 174 **C. *elegans* strains growth and maintenance**

175 Nematodes were maintained at 20°C on Nematode Growth Media (NGM) plates made  
176 with Bacto Agar (BD Biosciences). The plates were seeded with live *E. coli* OP50-1  
177 bacterial strain (cultured overnight at 37°C at 220 rpm) and allowed to grow overnight, as  
178 previously described (45). For experimental assays, after synchronization by standard  
179 procedure with sodium hypochlorite, 4<sup>th</sup> larval stage (L4) hermaphrodites (characterized  
180 by the appearance of a “Christmas tree vulva”) were selected and moved to test plates.  
181 The day after moving was considered adult day 1, and animals were assayed on day 3  
182 and day 10. Animals were transferred daily to avoid mixed population until they stop laying  
183 eggs.

## 184 **Blinding of experiments and replicates**

185 Insofar as possible, experimentalists were blinded to genotype. Data in the figures  
186 generally represents the pooled results of three experimental replicates with either two  
187 technical replicates per condition or two independent researchers blindly analyzing the  
188 data, with the total number of animals or neurons scored reported as N, as indicated.

## 189 **Locomotory Rate Assay**

190 Assay plates were prepared using standard procedures (46). Synchronized day 3 and  
191 day 10 adult animals were assayed for the actual experiment. For well-fed animals,  
192 locomotory rate was measured by removing 5 animals from original plate and transferring  
193 them to an assay plate. Five minutes after transfer, the number of body bends in 20 secs  
194 intervals was sequentially counted for each of the 5 animals on the assay plate and then  
195 repeated the same thing for next set of animals in a different assay plate.

## 196 **Thrashing Assay**

197 A drop of 2% agarose (ultraPURE® agarose) was poured over the glass slide and allowed  
198 to dry and then 20µl of M9 was poured on it. Age-synchronized animals were picked to  
199 that drop of M9 buffer. After 2 min in M9, thrashing rates were assessed via videography  
200 on a stereo dissecting scope. A single thrash was defined as a complete change in the  
201 direction of the body down the midline. Animals that were motionless for 10 secs were  
202 discarded from the analysis (47).

## 203 **Touch sensitivity assay**

204 The behavioral response to being touched by an eyelash was adapted from an assay  
205 previously described (48, 49). The animals were touched anteriorly specifically behind the  
206 terminal bulb of the pharynx with the eyelash, 10 times per animal, with a 10 sec gap  
207 between each touch. Typically, if the animal demonstrates an omega turn or if it reversed  
208 its direction after an anterior touch, the animal was scored as giving positive response.  
209 Touch response percentage was generated by the amount of times an animal responded  
210 to the touch stimulus over the total number of times they were touched.

## 211 **Life span analysis**

212 After alkaline hypochlorite treatment, synchronized L1 animals were placed on freshly  
213 grown OP50-1 seeded NGM plates. 15 animals from the 4<sup>th</sup> larval stage (L4) were  
214 transferred to a small (35mm) individual seeded NGM plate with a total 3 plates for each  
215 genotype. Each day they were transferred to new plates to avoid mixing of populations  
216 until they stopped producing offspring. Simultaneously the worms were counted alive  
217 visually or with gentle prodding on the head. Animals were censored in the event of  
218 internal hatching of larva, body rupture or crawling off the plate. The experiment was  
219 conducted at 20°C temperature and scored until all the worms died (50).

## 220 **Mitochondrial stress assays**

221 For paraquat (PQT) mild stress assays, synchronized 2-day old adult and 9-day old adult  
222 hermaphrodites were exposed to 8 mM PQT (51, 52) in NGM plate for overnight at 20°C.

223 Animals were picked from the respective (treated and control) plates the next day and  
224 imaged, as described below.

### 225 **Neurodegeneration assay**

226 For imaging, animals were mounted by placing them in 3% agarose pads on glass slides  
227 and immobilized with 1 mM tetramisole hydrochloride (Sigma). Imaging was performed  
228 using Confocal Laser Scanning Confocal microscope (Olympus 1X61) and FV10-ASW  
229 4.1 software. All images were acquired under the same exposure conditions with a 20x  
230 objective, and for each experimental replicate, all genotypes were represented and  
231 imaged that day. In analysis of touch neurons, *Pmec-4:: mCherry* expressing animals  
232 scored positive for the presence of extra neuronal processes when a visible mCherry-  
233 labeled branch was observed emanating from the posterior portion of ALM cell body.  
234 Similarly, ALM / PLM neuron pairs were scored as overextended when the PLM neurite  
235 extended anterior to the ALM cell body (53, 54). Other defects in axonal morphology were  
236 assigned to one of the following classes of neuronal abnormality: broken or gap in the  
237 axon structure, blebbed or bead like structure on the axon body, misguided or wavy  
238 shaped axon (55).

### 239 **Mitophagy assay**

240 A strain containing mito-mKeima (56, 57) expressed specifically in touch cells was used  
241 for assay. Animals were mounted on 2% agarose pads on glass slides and immobilized  
242 with 1 mM tetramisole hydrochloride before imaging. Imaging was performed using a  
243 Nikon Eclipse inverted microscope coupled to a six channel LED light source (Intelligent

244 Imaging Innovation, Denver, CO), an ORCA-Flash4.0 V2 Digital CMOS camera  
245 (Hamamatsu Photonics, Bridgewater Township, NJ) and Slidebook6 software (Intelligent  
246 Imaging Innovation, Denver, CO). All images were acquired under the same exposure  
247 conditions and each experiment was imaged in one session. The PLM cell body was  
248 identified by their position toward the posterior of the animal, near the tail and was focused  
249 with a 100x oil immersion lens under visible light using DIC contrast. 600-nm+ emissions  
250 were captured first following excitation at 550-nm and then immediately thereafter at 440-  
251 nm, keeping light intensity and exposure times constant between images. Images were  
252 quantified using Slidebook6 software by selecting the ROI, measuring the mean  
253 intensities for both channels and subtracting the background intensity. Mitophagy index  
254 was obtained by calculating the dual excitation 550-nm/440-nm ratio.

### 255 **Mitochondrial Morphology assay**

256 Mitochondrial morphology was analyzed using images acquired on a fluorescence  
257 microscopy rig as described above, from animals expressing mito-mKeima in the  
258 mechanosensory touch cells, acquired at 440-nm excitation, 600 nm+ emission. The  
259 morphological features were categorized into four distinct groups: 1) a network of long  
260 interconnected mitochondria with tubular-reticular or normal morphology, 2) visible  
261 fragmentation of the network, but lacking aggregates, 3) fragmentation consisting of short  
262 round mitochondria, but no more than one visible aggregate, 4) short round mitochondria  
263 comprising the majority of the population, with more than one large aggregate (58). Two  
264 investigators independently analyzed subsets of images and compared results to ensure  
265 the reproducibility of the analysis.

## 266 **Statistical Analysis**

267 All statistical analyses were conducted using Prism 8.0 (GraphPad Software), with alpha-  
268 error level of  $p < 0.05$  considered to be significant. Data were averaged and represented  
269 as mean  $\pm$  standard error (mean  $\pm$  SEM) unless otherwise noted. In general, group  
270 differences were analyzed with either one-way or two-way ANOVA depending upon the  
271 variables. Fisher's exact test was used to obtain p-values for the categorical data on  
272 pathologic neuronal morphology. Differences in lifespan were assessed by Mantel-Cox  
273 log rank analysis, and mitochondrial morphology data, which was categorical with four  
274 levels, was assessed using a Wilcoxon signed rank test. The sample sizes were based  
275 on those found previously in the laboratory to provide appropriate power for discerning  
276 phenotypic differences among genotypes. Graphs were plotted in Prism 8.0 (GraphPad  
277 Software) and Microsoft Excel.

## 278 **RESULTS**

### 279 **Single-copy tau mutants that mimic AD-associated PTMs impact behavior**

280 Tau expression via conventional extrachromosomal transgenic arrays in *C. elegans* has  
281 been shown to severely impact neuronal morphology and function (30). Here, in an  
282 attempt to circumvent potential caveats related to overexpression, novel transgenic AD  
283 models were engineered using single-copy Mos-transposon mediated insertion of a tau  
284 expression cassette into the worm genome (36, 42). The *mec-7* promoter was used to  
285 drive the expression of 0N4R tau (59, 60) as a translational fusion with the fluorescent  
286 protein Dendra2 (40) in mechanosensory touch neurons ALML/ALMR, AVM,

287 PLML/PLMR, and PVM (Fig. 1E-H), which mediate the behavioral response to light touch.  
288 The 0N4R fusion to Dendra2 will be referred to hereafter as TauT4. Dendra2 was also  
289 expressed alone (Fig. 1A-D), and these negative control strains responded to light touch  
290 similarly to the wild-type N2 strain at both day 3 and day 10 of adulthood (Fig. S1).

291 Surprisingly, TauT4 worms exhibited normal touch responsiveness as both young day 3  
292 post-reproductive adults (Fig. 2B) and older day 10 adults (Fig. 2C). In order to address  
293 the effect of tau PTMs, CRISPR-Cas9 gene editing (43, 44) was used to introduce  
294 phosphomimetic T231E, phosphoablation T231A, and acetylmimetic K274/281Q  
295 mutations into the TauT4 ORF (Fig. 2A). For simplicity, these mutants will be referred to  
296 as T231E, T231A and K274/281Q. Our results clearly demonstrate that T231E exhibited  
297 subtle but significant defects in touch responsiveness at both day 3 and day 10, while  
298 K274/281Q was different from the Dendra2 control only at day 10 (Fig. 2B,C). However,  
299 between day 3 and day 10, the touch sensitive phenotype of K274/281Q worsened  
300 significantly ( $p = 0.01$ ). This may indicate either a ceiling effect of T231E or a sensitized  
301 K274/281Q progression with age. In contrast, T231A was indistinguishable from TauT4.  
302 The differences between the disease-associated mutants and TauT4 represents a novel  
303 observation and a first-in-kind platform for studying the effect of pathologic tau  
304 modifications in the absence of baseline defects. Finally, since survival plots of the  
305 various strains used in this work were statistically indistinguishable, we were able to rule  
306 out any phenotypic age-dependence being due to a change in lifespan (Fig. S2E, F).

307 We also evaluated several other stereotypical behavioral measures that have been  
308 shown to be influenced by age but do not involve touch cell neurons, including thrashing

309 in liquid (Fig. S2A, B) and basal locomotion on solid media (Fig. S2C, D). Taken together,  
310 these data suggest that the effect of pathological, AD-relevant tau expression in touch  
311 sensory neurons is restricted to the behavioral response to light touch.

### 312 **T231E and K274/281Q mutants cause age-dependent abnormalities in neurite** 313 **morphology**

314 Normally, touch neurons are organized into precise anterior and posterior receptive fields,  
315 defined by the physical architecture of sensory neurites from ALM(L/R) and PLM(L/R);  
316 these neurites extend along the anterior or posterior half of the body, respectively, but do  
317 not overlap (54). Aging phenotypes in touch receptor neurons include a low incidence of  
318 morphologic defects, such as increased neurite overlap due to an overextension defect  
319 (55). We investigated whether single-copy expression of *Dendra2*, *TauT4* or the PTM  
320 mutants exacerbated these defects. A transgene consisting of an integrated *Pmec-*  
321 *4::mCherry* expression cassette was used to visualize the touch neurons using confocal  
322 microscopy (Fig. 3A-F). We found that T231E strongly and significantly increased the  
323 incidence of overextension from ~4% to ~40% by day 3 of adulthood (Fig. 3G). However,  
324 the *TauT4* and K274/281Q mutants were not significantly different from *Dendra2* controls  
325 in day 3 adults (Fig. 3G).

326 In addition to overextension defect, other neuritic abnormalities develop with age, such  
327 as branching, guidance defects, beading, and breakage (Fig. 3C-F). While none of the  
328 strains were significantly different in terms of these defects at day 3 (data not shown),  
329 both T231E and K274/281Q exhibited an increased incidence of overextension,



330 guidance, and gap defects at day 10, but were not different with respect to branching or  
331 beading compared to the Dendra2, TauT4 or T231A mutant strains (Fig. 3H-K). It was  
332 intriguing that age exacerbated the overlap defect in K274/281Q ( $p = 0.05$ , between day  
333 3 and day 10), which mirrored its effect on touch sensitivity, but that T231E had reached  
334 its maximum penetrance by day 3 of adulthood. These results suggested to us that this  
335 model is appropriate to detect subtle differences in pathology and “disease” progression  
336 as a function of specific tau PTMs.

### 337 **Mitochondrial fragmentation in tau PTM mutants**

338 Impaired mitochondrial dynamics and excessive fragmentation have been observed in  
339 AD postmortem brains and in AD mouse models (61-63). However, the effects of disease-  
340 relevant, site-specific phosphorylated or acetylated tau on mitochondrial morphology in  
341 neurons have not been thoroughly studied in the absence of tau overexpression. To  
342 investigate whether a causal relationship exists between tau PTMs and mitochondrial  
343 morphology, we examined the mitochondrial network in the PLM cell bodies at day 3 and  
344 at day 10 of adulthood in our tau PTM mutant models. Touch cell mitochondria were  
345 labeled with mito-mKeima, a pH-sensitive fluorescent biosensor (56, 57). Mito-mKeima  
346 can be used as a dual excitation ratiometric mitophagy reporter, as we expand upon  
347 below (Fig. 5 and 6). However, here we used single wavelength excitation-emission  
348 imaging of mito-mKeima in the appropriate channel to visualize mitochondrial structure,  
349 such as shown in Fig. 4. Under these image acquisition conditions, mitochondria are  
350 visible, but mitochondria that have been engulfed by acidic vesicles are not (for  
351 convenience, heretofore we will refer to these structures as “mitolysosomes”). Based

352 upon these images, mitochondria were categorized into four levels, from normal tubular-  
353 reticular morphology through increasing degrees of fragmentation (Fig. 4A-D and  
354 Methods). Neuronal mitochondria from day 3 adult animals had generally tubular-reticular  
355 morphology, and their distribution was independent of tau genotype (data not shown).  
356 However, by day 10 of adulthood, all of the strains contained some fragmented  
357 mitochondria, consistent with age-associated remodeling, but it was clear that T231E and  
358 K274/281Q were significantly more fragmented than Dendra2, TauT4 or T231A (Fig. 4E).

### 359 **Pathologic tau modifications suppress stress-induced mitophagy**

360 Next, we employed mito-mKeima in dual excitation mode in order to assess organelle  
361 turnover. Throughout a neuron's lifetime, aged and damaged mitochondria undergo  
362 dynamic recycling and elimination (64). Mitophagy is a type of cargo-selective autophagy  
363 where defective mitochondria are engulfed by autophagosomes and subsequently  
364 degraded by fusion with lysosomes (Fig. S3) (65). This process of mitochondrial quality  
365 control (MQC) can be impaired during aging and has been associated with major  
366 neurodegenerative disorders including AD (66, 67). Mito-mKeima has a unique spectral  
367 characteristic whereby at neutral pH or above, such as occurs in the mitochondrial matrix,  
368 excitation at 440-nm results in emission at 600-nm+, but at acidic pH, such as occurs in  
369 the lysosome, the excitation maxima shifts to 550-nm (akin to a conventional red  
370 fluorescent protein). Mito-mKeima is also resistant to degradation by lysosomal  
371 proteases. These characteristics allows a mitophagy index to be calculated using dual  
372 excitation ratio imaging that reflects the relative amount of mitochondria that have  
373 undergone engulfment and fusion with acidic vesicles. In addition, because these

374 mitolysosomes are spectrally and morphologically distinct (Fig. 5), we can also assess  
375 their absolute abundance and size.

376 In PLM neurons, pathologic tau modifications T231E and K274/281Q had little effect on  
377 baseline mitophagy, but decreased the number of mitolysosomes in young adults (Fig.  
378 5). We also note an apparent increase in the mitophagy index and reduction in the number  
379 of mitolysosomes with age that reached significance in Dendra2, TauT4, and T231A, but  
380 not in T231E and K274/281Q (Fig. 5G, H, I, J).

381 Next, we sought to evaluate the impact of oxidative stress on neuronal mitophagy. These  
382 studies are particularly significant, as chronic mitochondrial stress is likely to be a factor  
383 in neurodegenerative diseases including AD (68). To induce mitophagy, Dendra 2, TauT4  
384 and PTM mutant strains expressing mito-mKeima in touch cells were treated with 8 mM  
385 mitochondrial complex I inhibitor paraquat (PQT) overnight (Fig. S4). PQT has been used  
386 extensively in worms, including for this purpose (51, 52). The next day, mitophagy was  
387 assessed through dual-excitation ratio imaging. Unsurprisingly, PQT treatment increased  
388 mitophagy in Dendra2 at both day 3 and day 10 of adulthood (Fig. 6A, B, E, F). As found  
389 for previous measures, TauT4 and T231A were indistinguishable from Dendra2 (Fig. 6E,  
390 F). However, PQT-induced mitophagy was abolished in T231E and K274/281Q at both  
391 day 3 and day 10 (compare Fig. 6B and D as well as 6E, F). We conclude that site-specific  
392 phosphorylation and/or acetylation of tau, in addition to being a mitocentric stress in-and-  
393 of itself, has the ability to reduce normal mitochondrial responses to subsequent stress,  
394 which could impact mitochondrial function and neuronal health during aging.

395 **DISCUSSION**

396 A characteristic hallmark of the AD brain is the presence of tau with PTMs defined as  
397 pathological, that likely contribute to the onset and progression of the disease.  
398 Phosphorylation of tau at specific epitopes is widely appreciated to contribute to AD (6,  
399 8), with acetylation of tau at specific sites also shown to contribute to the evolution of tau  
400 pathology (18, 19). While it has now become evident that the insoluble accumulations of  
401 tau in the AD are likely not the primary toxic species (5-7, 69), the specific mechanisms  
402 by which monomers or soluble oligomers of tau with AD-relevant PTMs cause neuronal  
403 dysfunction have not been fully delineated. This is due in part to the fact that the majority  
404 of studies have used models in which tau is overexpressed, which can result in outcomes  
405 that may not be directly relevant to AD pathogenesis. To avoid this potential confounding  
406 factor, we generated *C. elegans* strains containing single-copy expression cassettes  
407 coding for tau and tau with AD-associated PTMs. These transgenic animals allowed us  
408 to make several key discoveries, which provide important insights into the mechanisms  
409 by which tau with AD-relevant PTMs when expressed at physiological levels may impair  
410 neuron function.

411 Although 0N4R human brain tau isoform contains almost 70 potential phosphorylation  
412 sites that span the entire molecule (4), only select residues are phosphorylated  
413 physiologically and/or pathologically. One key disease-relevant site is T231 that shows  
414 increased phosphorylation early in the evolution of AD tau pathology and greater levels  
415 in “pre-tangle” neurons (8). Phosphorylation of T231 results in a decrease in microtubule  
416 association (70), likely due to the conformational shift and decreased tubulin binding that

417 was observed with a pseudophosphorylated tau construct (10). A S235/T231E tau  
418 construct also showed mislocalization in mature neurons (71). Intriguingly, we observed  
419 that at day 3 worms expressing T231E showed subtle but significant defects in touch  
420 sensitivity and neurite morphology, while those expressing the acetylation mimic  
421 K274/281Q did not. However, by day 10 significant deficits in touch sensitivity and neurite  
422 morphology were observed in both T231E and K274/281Q. Thus functional decline of the  
423 touch neurons due to tau modifications is highly correlated with altered neuron  
424 morphology providing hints towards commonalities with the aging mammalian brain and  
425 suggesting conserved mechanisms can be operative in neuronal decline across phyla  
426 (72). Overall these data may suggest that phosphorylation at T231 is an early initiator of  
427 tau dysfunction in AD. These findings also correlate with the fact that increases in  
428 phosphorylation at T231 precede increased acetylation at K274/281 in the evolution of  
429 AD tau pathology (4, 73).

430 Mitochondria are crucial metabolic hubs dictating cell fate decisions, and mitochondrial  
431 dysfunction likely plays a critical role in the pathogenesis of AD (23, 24, 72). Mitochondria  
432 possess dedicated MQC mechanisms to ensure their fidelity (65). Abnormalities in MQC  
433 pathways noted to occur in AD (64) may arise in part through the action of tau species  
434 with aberrant PTMs (74). Mitophagy, which is a form of selective autophagy that delivers  
435 dysfunctional mitochondria to lysosomes for recycling, is a key player in MQC. *C. elegans*  
436 have been widely used to study neuronal function, aging, and MQC mechanisms, as well  
437 as to model proteotoxic neurodegenerative disorders (75). Therefore, we next examined  
438 the impact of T231E and K274/281Q on mitochondrial biology. In contrast to the deficits  
439 in touch sensitivity and neuronal morphology observed at day 3, neither T231E nor

440 K274/281Q negatively impacted mitochondrial morphology at that age. However, by day  
441 10 mitochondrial fragmentation was significantly exacerbated in T231E and K274/281Q,  
442 which could be reflective of a deficit in mitophagy. Therefore, we measured the relative  
443 amount of mitochondria that were engulfed and fused with acidic compartments, as well  
444 as the absolute abundance of mitochondria in acidic compartments (“mitolysosomes”).

445 Interestingly, we found that in control animals, the mitophagy index, a measure of relative  
446 mitolysosome to mitochondria abundance, increased with age, and the number of  
447 mitolysosomes decreased (Fig. 5). The factors critical for the effective turnover of  
448 damaged mitochondria during aging likely include underlying stress, as well as  
449 autophagic and lysosomal capacities. While there are other reports of mitophagy  
450 increasing with age in systems including *Drosophila* (76), mouse (77) and human disease  
451 (78), there is also evidence that mitophagy becomes, like many types of stress responses,  
452 impaired with age (79). Although our data support the former studies, we note that mito-  
453 mKeima is resistant to acid proteases and likely accumulates over time. In fact, a  
454 decreased number of brighter mitolysosomes in day 10 animals may represent  
455 cumulative vesicle fusion, and so we need to temper our conclusion to reflect this caveat.  
456 Nevertheless, we were able to stimulate mitophagy using PQT at day 10 to a similar  
457 extent as day 3 (Fig. 6), confirming that, at a minimum, the ability to generate a robust  
458 response to oxidative stress is maintained in older wild type animals.

459 Our results demonstrate a striking abolition of PQT-induced mitophagy in the AD-relevant  
460 T231E and K274/281Q mutants (Fig. 6). This observation is consistent with defective  
461 mitophagy being a prominent feature in age-related disorders (80), including AD (81), and

462 contributing to premature aging such as observed in Werner's syndrome patients and  
463 invertebrate Werner's disease models (82). It is also particularly intriguing that the T231E  
464 and K274/281Q do not appear to exhibit the same age-dependence as Dendra2, TauT4,  
465 or T231A. This could be interpreted to mean that these mutants exhibit characteristics  
466 that appear in older adults. Their inability to respond appropriately to oxidative stress –  
467 at both a young and old age - suggests that the mitochondria in fact do have baseline  
468 defects, albeit at a level that is not discernable in the absence of stress. The recent finding  
469 that mitophagy enhancement can suppress AD-related phenotypes in tau transgenic  
470 animals lends support to this idea (83).

471 It will be of interest to determine whether the tau mutants described here are perceived  
472 as stressors, and hence cause activation of a retrograde response, such as has been  
473 described previously for the *C. elegans* Nrf2 ortholog SKN-1 in adaptation to a decrease  
474 in mitophagy (84). Alternatively, other retrograde signaling pathways such as that  
475 mediated by ATFS-1 and the mitochondrial unfolded protein response (mtUPR) can also  
476 mediate adaptation to mitochondrial stress (85), including stress due to defects in  
477 mitophagy machinery (86). However, prolonged cellular activation of the mtUPR has been  
478 shown to be maladaptive in a *C. elegans* model of dopaminergic neurodegeneration (87),  
479 suggesting that ultimate role of stress response pathways is context dependent. It is also  
480 possible that the single-copy tau mutants do not elicit stress-responses in-and-of  
481 themselves, but instead sensitize neurons to additional stressors, consistent with our  
482 mitophagy results.

## 483 **CONCLUSION**

484 In conclusion, to our knowledge this is the first study to clearly demonstrate that single  
485 copy expression of tau with AD-associated PTMs impairs neuronal function and structure  
486 in an age-dependent manner. In addition, the effect of tau modifications on stress-induced  
487 mitophagy could lead to cumulative metabolic defects and energetic crises with age. One  
488 advantage of our single-copy model is that it allows us to quantitatively measure subtle  
489 deficits and discriminate between the effects of distinct PTMs. For example, we  
490 demonstrate that T231E presents with a neuronal functional (and morphological) deficit  
491 earlier than K274/281Q. Since stress-induced mitophagy was abolished equally by both,  
492 it is likely that AD-associated, pathologic tau mutants are differentially impacting neuron  
493 structure/function through at least one other mechanism. However, further studies are  
494 needed to determine if these pathways are separate and isolated, and if they interact,  
495 whether they are additive or synergistic. We anticipate that this new *C. elegans* AD model  
496 represents a foundation to achieve a more nuanced understanding of how tau PTMs  
497 impact neuronal function.

## 498 **Abbreviations**

499 AD - Alzheimer's disease; CRISPR - clustered regularly interspaced short palindromic  
500 repeats; Cas9 - CRISPR associated protein 9; ETC - electron transport chain; MQC -  
501 Mitochondrial quality control; MosSCI - Mos-mediated single copy insertion; NGM  
502 nematode growth media; PQT – paraquat; PTM - post translational modification



503 **DECLARATIONS**

504 **Availability of Data and Materials.** The datasets used and/or analysed during the  
505 current study are available from the corresponding author on reasonable request.

506 **Competing Interests.** None declared.

507 **Funding.** This work was supported by NIH R21AG060627 (KN and GJ). Some strains  
508 were provided by the CGC, which is funded by NIH Office of Research Infrastructure  
509 Programs (P40 OD010440).

510 **Author contributions.** Conceived and designed the experiments: SG GJ KN. Performed  
511 the experiments: SG SF. Analyzed the data: SG SF GJ KN. Wrote the paper: SG GJ KN.  
512 All authors read and approved the final manuscript

513 **Acknowledgements.** Technical assistance provided by Teresa Sherman, Joseph  
514 Cartella, Alan Alberto and Ejiroghene Okarevu was greatly appreciated. We thank the  
515 members of Dr. Johnson's lab, the Mitochondrial Research and Interest Group at the  
516 University of Rochester Medical Center and the members of the Western New York worm  
517 meeting for their valuable suggestions and helpful discussions.

518 **REFERENCES**

519

520 1. Selkoe DJ. Alzheimer's disease: genes, proteins, and therapy. *Physiol Rev.*  
521 2001;81(2):741-66.

522 2. Avila J, Lucas JJ, Perez M, Hernandez F. Role of tau protein in both physiological  
523 and pathological conditions. *Physiol Rev.* 2004;84(2):361-84.

524 3. Irwin DJ, Cohen TJ, Grossman M, Arnold SE, Xie SX, Lee VMY, et al. Acetylated  
525 tau, a novel pathological signature in Alzheimer's disease and other tauopathies.  
526 *Brain.* 2012;135(3):807-18.

527 4. Neddens J, Temmel M, Flunkert S, Kerschbaumer B, Hoeller C, Loeffler T, et al.  
528 Phosphorylation of different tau sites during progression of Alzheimer's disease.  
529 *Acta Neuropathol Commun.* 2018;6(1):52.

530 5. Wu X-L, Piña-Crespo J, Zhang Y-W, Chen X-C, Xu H-X. Tau-mediated  
531 Neurodegeneration and Potential Implications in Diagnosis and Treatment of  
532 Alzheimer's Disease. *Chin Med J (Engl).* 2017;130(24):2978-90.

533 6. Mi K, Johnson GVW. The role of tau phosphorylation in the pathogenesis of  
534 Alzheimer's disease. *Curr Alzheimer Res.* 2006;3(5):449-63.

535 7. Mroczko B, Groblewska M, Litman-Zawadzka A. The Role of Protein Misfolding and  
536 Tau Oligomers (TauOs) in Alzheimer's Disease (AD). *Int J Mol Sci.* 2019;20(19).

537 8. Augustinack JC, Schneider A, Mandelkow EM, Hyman BT. Specific tau  
538 phosphorylation sites correlate with severity of neuronal cytopathology in  
539 Alzheimer's disease. *Acta Neuropathol.* 2002;103(1):26-35.

- 540 9. Israel MA, Yuan SH, Bardy C, Reyna SM, Mu Y, Herrera C, et al. Probing sporadic  
541 and familial Alzheimer's disease using induced pluripotent stem cells. *Nature*.  
542 2012;482(7384):216-20.
- 543 10. Schwalbe M, Kadavath H, Biernat J, Ozenne V, Blackledge M, Mandelkow E, et al.  
544 Structural Impact of Tau Phosphorylation at Threonine 231. *Structure*.  
545 2015;23(8):1448-58.
- 546 11. Alonso AD, Cohen LS, Corbo C, Morozova V, Elidrissi A, Phillips G, et al.  
547 Hyperphosphorylation of Tau Associates With Changes in Its Function Beyond  
548 Microtubule Stability. *Front Cell Neurosci*. 2018;12:338.
- 549 12. Sillen A, Barbier P, Landrieu I, Lefebvre S, Wieruszeski J-M, Leroy A, et al. NMR  
550 investigation of the interaction between the neuronal protein tau and the  
551 microtubules. *Biochemistry*. 2007;46(11):3055-64.
- 552 13. Sengupta A, Kabat J, Novak M, Wu Q, Grundke-Iqbal I, Iqbal K. Phosphorylation of  
553 tau at both Thr 231 and Ser 262 is required for maximal inhibition of its binding to  
554 microtubules. *Arch Biochem Biophys*. 1998;357(2):299-309.
- 555 14. Shafiei SS, Guerrero-Munoz MJ, Castillo-Carranza DL. Tau Oligomers:  
556 Cytotoxicity, Propagation, and Mitochondrial Damage. *Front Aging Neurosci*.  
557 2017;9:83.
- 558 15. Alonso AD, Di Clerico J, Li B, Corbo CP, Alaniz ME, Grundke-Iqbal I, et al.  
559 Phosphorylation of tau at Thr212, Thr231, and Ser262 combined causes  
560 neurodegeneration. *J Biol Chem*. 2010;285(40):30851-60.
- 561 16. Tracy TE, Gan L. Acetylated tau in Alzheimer's disease: An instigator of synaptic  
562 dysfunction underlying memory loss: Increased levels of acetylated tau blocks the

- 563 postsynaptic signaling required for plasticity and promotes memory deficits  
564 associated with tauopathy. *Bioessays*. 2017;39(4).
- 565 17. Min SW, Cho SH, Zhou Y, Schroeder S, Haroutunian V, Seeley WW, et al.  
566 Acetylation of tau inhibits its degradation and contributes to tauopathy. *Neuron*.  
567 2010;67(6):953-66.
- 568 18. Cohen TJ, Guo JL, Hurtado DE, Kwong LK, Mills IP, Trojanowski JQ, et al. The  
569 acetylation of tau inhibits its function and promotes pathological tau aggregation.  
570 *Nat Commun*. 2011;2:252.
- 571 19. Min S-W, Chen X, Tracy TE, Li Y, Zhou Y, Wang C, et al. Critical role of acetylation  
572 in tau-mediated neurodegeneration and cognitive deficits. *Nature Medicine*.  
573 2015;21(10):1154-62.
- 574 20. Sohn PD, Tracy TE, Son HI, Zhou Y, Leite RE, Miller BL, et al. Acetylated tau  
575 destabilizes the cytoskeleton in the axon initial segment and is mislocalized to the  
576 somatodendritic compartment. *Mol Neurodegener*. 2016;11(1):47.
- 577 21. Ajit D, Trzeciakiewicz H, Tseng JH, Wander CM, Chen Y, Ajit A, et al. A unique tau  
578 conformation generated by an acetylation-mimic substitution modulates P301S-  
579 dependent tau pathology and hyperphosphorylation. *J Biol Chem*.  
580 2019;294(45):16698-711.
- 581 22. Tracy TE, Sohn PD, Minami SS, Wang C, Min SW, Li Y, et al. Acetylated Tau  
582 Obstructs KIBRA-Mediated Signaling in Synaptic Plasticity and Promotes  
583 Tauopathy-Related Memory Loss. *Neuron*. 2016;90(2):245-60.
- 584 23. Hu H, Tan CC, Tan L, Yu JT. A Mitocentric View of Alzheimer's Disease. *Mol*  
585 *Neurobiol*. 2017;54(8):6046-60.

- 586 24. Swerdlow RH. Mitochondria and Mitochondrial Cascades in Alzheimer's Disease. J  
587 Alzheimers Dis. 2018;62(3):1403-16.
- 588 25. Li XC, Hu Y, Wang ZH, Luo Y, Zhang Y, Liu XP, et al. Human wild-type full-length  
589 tau accumulation disrupts mitochondrial dynamics and the functions via increasing  
590 mitofusins. Sci Rep. 2016;6:24756.
- 591 26. David DC, Hauptmann S, Scherping I, Schuessel K, Keil U, Rizzu P, et al.  
592 Proteomic and functional analyses reveal a mitochondrial dysfunction in P301L tau  
593 transgenic mice. J Biol Chem. 2005;280(25):23802-14.
- 594 27. Safiulina D, Kaasik A. Energetic and dynamic: how mitochondria meet neuronal  
595 energy demands. PLoS Biol. 2013;11(12):e1001755.
- 596 28. Mattson MP, Gleichmann M, Cheng A. Mitochondria in neuroplasticity and  
597 neurological disorders. Neuron. 2008;60(5):748-66.
- 598 29. Kraemer BC, Zhang B, Leverenz JB, Thomas JH, Trojanowski JQ, Schellenberg  
599 GD. Neurodegeneration and defective neurotransmission in a *Caenorhabditis*  
600 *elegans* model of tauopathy. Proc Natl Acad Sci U S A. 2003;100(17):9980-5.
- 601 30. Miyasaka T, Ding Z, Gengyo-Ando K, Oue M, Yamaguchi H, Mitani S, et al.  
602 Progressive neurodegeneration in *C. elegans* model of tauopathy. Neurobiol Dis.  
603 2005;20(2):372-83.
- 604 31. Butler VJ, Salazar DA, Soriano-Castell D, Alves-Ferreira M, Dennissen FJA, Vohra  
605 M, et al. Tau/MAPT disease-associated variant A152T alters tau function and  
606 toxicity via impaired retrograde axonal transport. Hum Mol Genet. 2019;28(9):1498-  
607 514.

- 608 32. Chee F, Mudher A, Newman TA, Cuttle M, Lovestone S, Shepherd D.  
609 Overexpression of tau results in defective synaptic transmission in *Drosophila*  
610 neuromuscular junctions. *Biochem Soc Trans.* 2006;34(Pt 1):88-90.
- 611 33. Kosmidis S, Grammenoudi S, Papanikolopoulou K, Skoulakis EMC. Differential  
612 Effects of Tau on the Integrity and Function of Neurons Essential for Learning in  
613 *Drosophila*. *Journal of Neuroscience.* 2010;30(2):464-77.
- 614 34. Maeda S, Djukic B, Taneja P, Yu G-Q, Lo I, Davis A, et al. Expression of A152T  
615 human tau causes age-dependent neuronal dysfunction and loss in transgenic  
616 mice. *EMBO Rep.* 2016;17(4):530-51.
- 617 35. Maeda S, Sato Y, Takashima A. Frontotemporal dementia with Parkinsonism linked  
618 to chromosome-17 mutations enhance tau oligomer formation. *Neurobiol Aging.*  
619 2018;69:26-32.
- 620 36. Frokjaer-Jensen C, Davis MW, Sarov M, Taylor J, Flibotte S, LaBella M, et al.  
621 Random and targeted transgene insertion in *Caenorhabditis elegans* using a  
622 modified Mos1 transposon. *Nat Methods.* 2014;11(5):529-34.
- 623 37. Chalfie M, Thomson JN. Structural and functional diversity in the neuronal  
624 microtubules of *Caenorhabditis elegans*. *J Cell Biol.* 1982;93(1):15-23.
- 625 38. Prasanth MI, Gayathri S, Bhaskar JP, Krishnan V, Balamurugan K. Analyzing the  
626 Synergistic Effects of Antioxidants in Combating Photoaging Using Model  
627 Nematode, *Caenorhabditis elegans*. *Photochem Photobiol.*  
628 2019;10.1111/php.13167.
- 629 39. Sagi D, Kim SK. An engineering approach to extending lifespan in *C. elegans*. *PLoS*  
630 *genetics.* 2012;8(6):e1002780-e.

- 631 40. Gurskaya NG, Verkhusha VV, Shcheglov AS, Staroverov DB, Chepurnykh TV,  
632 Fradkov AF, et al. Engineering of a monomeric green-to-red photoactivatable  
633 fluorescent protein induced by blue light. *Nat Biotechnol.* 2006;24(4):461-5.
- 634 41. Nehrke K, Begenisich T, Pilato J, Melvin JE. Into ion channel and transporter  
635 function. *Caenorhabditis elegans* ClC-type chloride channels: novel variants and  
636 functional expression. *Am J Physiol Cell Physiol.* 2000;279(6):C2052-C66.
- 637 42. Frokjaer-Jensen C, Davis MW, Hopkins CE, Newman BJ, Thummel JM, Olesen  
638 SP, et al. Single-copy insertion of transgenes in *Caenorhabditis elegans*. *Nat*  
639 *Genet.* 2008;40(11):1375-83.
- 640 43. Kim H, Ishidate T, Ghanta KS, Seth M, Conte D, Jr., Shirayama M, et al. A co-  
641 CRISPR strategy for efficient genome editing in *Caenorhabditis elegans*. *Genetics.*  
642 2014;197(4):1069-80.
- 643 44. Paix A, Folkmann A, Rasoloson D, Seydoux G. High Efficiency, Homology-Directed  
644 Genome Editing in *Caenorhabditis elegans* Using CRISPR-Cas9  
645 Ribonucleoprotein Complexes. *Genetics.* 2015;201(1):47-54.
- 646 45. Brenner S. The genetics of *Caenorhabditis elegans*. *Genetics.* 1974;77(1):71-94.
- 647 46. Kim H, Calatayud C, Guha S, Fernandez-Carasa I, Berkowitz L, Carballo-Carbajal  
648 I, et al. The Small GTPase RAC1/CED-10 Is Essential in Maintaining Dopaminergic  
649 Neuron Function and Survival Against alpha-Synuclein-Induced Toxicity. *Mol*  
650 *Neurobiol.* 2018;55(9):7533-52.
- 651 47. Wang J, Farr GW, Hall DH, Li F, Furtak K, Dreier L, et al. An ALS-linked mutant  
652 SOD1 produces a locomotor defect associated with aggregation and synaptic

- 653 dysfunction when expressed in neurons of *Caenorhabditis elegans*. *PLoS Genet.*  
654 2009;5(1):e1000350.
- 655 48. Chen X, Chalfie M. Modulation of *C. elegans* Touch Sensitivity Is Integrated at  
656 Multiple Levels. *Journal of Neuroscience.* 2014;34(19):6522-36.
- 657 49. Chatzigeorgiou M, Grundy L, Kindt KS, Lee W-H, Driscoll M, Schafer WR. Spatial  
658 asymmetry in the mechanosensory phenotypes of the *C. elegans* DEG/ENaC gene  
659 *mec-10*. *J Neurophysiol.* 2010;104(6):3334-44.
- 660 50. Sutphin GL, Kaeberlein M. Measuring *Caenorhabditis elegans* life span on solid  
661 media. *J Vis Exp.* 2009(27).
- 662 51. Charmpilas N, Kounakis K, Tavernarakis N. Monitoring Mitophagy During Aging in  
663 *Caenorhabditis elegans*. *Methods Mol Biol.* 2018;1759:151-60.
- 664 52. Palikaras K, Tavernarakis N. Assessing Mitochondrial Selective Autophagy in the  
665 Nematode *Caenorhabditis elegans*. *Methods Mol Biol.* 2017;1567:349-61.
- 666 53. Chen C-H, Chen Y-C, Jiang H-C, Chen C-K, Pan C-L. Neuronal aging: learning  
667 from *C. elegans*. *J Mol Signal.* 2013;8(1):14-.
- 668 54. Gallegos ME, Bargmann CI. Mechanosensory Neurite Termination and Tiling  
669 Depend on SAX-2 and the SAX-1 Kinase. *Neuron.* 2004;44(2):239-49.
- 670 55. Marcette JD, Chen JJ, Nonet ML. The *Caenorhabditis elegans* microtubule minus-  
671 end binding homolog PTRN-1 stabilizes synapses and neurites. *Elife.*  
672 2014;3:e01637.
- 673 56. Sun N, Malide D, Liu J, Rovira, II, Combs CA, Finkel T. A fluorescence-based  
674 imaging method to measure in vitro and in vivo mitophagy using mt-Keima. *Nat*  
675 *Protoc.* 2017;12(8):1576-87.



- 676 57. Williams JA, Zhao K, Jin S, Ding W-X. New methods for monitoring mitochondrial  
677 biogenesis and mitophagy in vitro and in vivo. *Experimental Biology and Medicine*.  
678 2017;242(8):781-7.
- 679 58. Jiang H-C, Hsu J-M, Yen C-P, Chao C-C, Chen R-H, Pan C-L. Neural activity and  
680 CaMKII protect mitochondria from fragmentation in aging *Caenorhabditis*  
681 *elegans* neurons. *Proceedings of the National Academy of Sciences*.  
682 2015;112(28):8768-73.
- 683 59. Kolarova M, Garcia-Sierra F, Bartos A, Ricny J, Ripova D. Structure and pathology  
684 of tau protein in Alzheimer disease. *Int J Alzheimers Dis*. 2012;2012:731526.
- 685 60. Dregni AJ, Mandala VS, Wu H, Elkins MR, Wang HK, Hung I, et al. In vitro ON4R  
686 tau fibrils contain a monomorphic  $\beta$ -sheet core enclosed by dynamically  
687 heterogeneous fuzzy coat segments. *Proc Natl Acad Sci U S A*.  
688 2019;116(33):16357-66.
- 689 61. Manczak M, Calkins MJ, Reddy PH. Impaired mitochondrial dynamics and  
690 abnormal interaction of amyloid beta with mitochondrial protein Drp1 in neurons  
691 from patients with Alzheimer's disease: implications for neuronal damage. *Hum Mol*  
692 *Genet*. 2011;20(13):2495-509.
- 693 62. Reddy PH, Manczak M, Yin X. Mitochondria-Division Inhibitor 1 Protects Against  
694 Amyloid- $\beta$  induced Mitochondrial Fragmentation and Synaptic Damage in  
695 Alzheimer's Disease. *Journal of Alzheimer's Disease*. 2017;58(1):147-62.
- 696 63. Kandimalla R, Manczak M, Fry D, Suneetha Y, Sesaki H, Reddy PH. Reduced  
697 dynamin-related protein 1 protects against phosphorylated Tau-induced

- 698 mitochondrial dysfunction and synaptic damage in Alzheimer's disease. *Hum Mol*  
699 *Genet.* 2016;25(22):4881-97.
- 700 64. Cai Q, Tammineni P. Alterations in Mitochondrial Quality Control in Alzheimer's  
701 Disease. *Front Cell Neurosci.* 2016;10:24.
- 702 65. Hamacher-Brady A, Brady NR. Mitophagy programs: mechanisms and  
703 physiological implications of mitochondrial targeting by autophagy. *Cell Mol Life Sci.*  
704 2016;73(4):775-95.
- 705 66. Martinez-Vicente M. Neuronal Mitophagy in Neurodegenerative Diseases. *Front*  
706 *Mol Neurosci.* 2017;10:64.
- 707 67. Wang Y, Liu N, Lu B. Mechanisms and roles of mitophagy in neurodegenerative  
708 diseases. *CNS Neurosci Ther.* 2019;25(7):859-75.
- 709 68. Cenini G, Voos W. Mitochondria as Potential Targets in Alzheimer Disease  
710 Therapy: An Update. *Front Pharmacol.* 2019;10:902.
- 711 69. Santacruz K, Lewis J, Spires T, Paulson J, Kotilinek L, Ingelsson M, et al. Tau  
712 suppression in a neurodegenerative mouse model improves memory function.  
713 *Science.* 2005;309(5733):476-81.
- 714 70. Cho JH, Johnson GV. Primed phosphorylation of tau at Thr231 by glycogen  
715 synthase kinase 3beta (GSK3beta) plays a critical role in regulating tau's ability to  
716 bind and stabilize microtubules. *J Neurochem.* 2004;88(2):349-58.
- 717 71. Xia D, Li C, Götz J. Pseudophosphorylation of Tau at distinct epitopes or the  
718 presence of the P301L mutation targets the microtubule-associated protein Tau to  
719 dendritic spines. *Biochim Biophys Acta.* 2015;1852(5):913-24.

- 720 72. Ułamek-Kozioł M, Furmaga-Jabłońska W, Januszewski S, Brzozowska J,  
721 Sciślewska M, Jabłoński M, et al. Neuronal autophagy: self-eating or self-  
722 cannibalism in Alzheimer's disease. *Neurochem Res.* 2013;38(9):1769-73.
- 723 73. Mondragón-Rodríguez S, Perry G, Zhu X, Moreira PI, Acevedo-Aquino MC,  
724 Williams S. Phosphorylation of tau protein as the link between oxidative stress,  
725 mitochondrial dysfunction, and connectivity failure: implications for Alzheimer's  
726 disease. *Oxid Med Cell Longev.* 2013;2013:940603-.
- 727 74. Quintanilla RA, Dolan PJ, Jin YN, Johnson GV. Truncated tau and Aβeta  
728 cooperatively impair mitochondria in primary neurons. *Neurobiol Aging.*  
729 2012;33(3):619 e25-35.
- 730 75. Kraemer BC, Burgess JK, Chen JH, Thomas JH, Schellenberg GD. Molecular  
731 pathways that influence human tau-induced pathology in *Caenorhabditis elegans*.  
732 *Human molecular genetics.* 2006;15(9):1483-96.
- 733 76. Cornelissen T, Vilain S, Vints K, Gounko N, Verstreken P, Vandenberghe W.  
734 Deficiency of parkin and PINK1 impairs age-dependent mitophagy in *Drosophila*.  
735 *eLife.* 2018;7:e35878.
- 736 77. Yeo D, Kang C, Gomez-Cabrera MC, Vina J, Ji LL. Intensified mitophagy in skeletal  
737 muscle with aging is downregulated by PGC-1α overexpression in vivo. *Free*  
738 *Radic Biol Med.* 2019;130:361-8.
- 739 78. Hou X, Fiesel FC, Truban D, Castanedes Casey M, Lin W-L, Soto AI, et al. Age-  
740 and disease-dependent increase of the mitophagy marker phospho-ubiquitin in  
741 normal aging and Lewy body disease. *Autophagy.* 2018;14(8):1404-18.

- 742 79. Drake JC, Yan Z. Mitophagy in maintaining skeletal muscle mitochondrial  
743 proteostasis and metabolic health with ageing. *J Physiol.* 2017;595(20):6391-9.
- 744 80. Fivenson EM, Lautrup S, Sun N, Scheibye-Knudsen M, Stevnsner T, Nilsen H, et  
745 al. Mitophagy in neurodegeneration and aging. *Neurochem Int.* 2017;109:202-9.
- 746 81. Chakravorty A, Jetto CT, Manjithaya R. Dysfunctional Mitochondria and Mitophagy  
747 as Drivers of Alzheimer's Disease Pathogenesis. *Frontiers in aging neuroscience.*  
748 2019;11:311-.
- 749 82. Fang EF, Hou Y, Lautrup S, Jensen MB, Yang B, SenGupta T, et al. NAD(+)  
750 augmentation restores mitophagy and limits accelerated aging in Werner  
751 syndrome. *Nature communications.* 2019;10(1):5284-.
- 752 83. Fang EF, Hou Y, Palikaras K, Adriaanse BA, Kerr JS, Yang B, et al. Mitophagy  
753 inhibits amyloid- $\beta$  and tau pathology and reverses cognitive deficits in models of  
754 Alzheimer's disease. *Nature neuroscience.* 2019;22(3):401-12.
- 755 84. Palikaras K, Lionaki E, Tavernarakis N. Coordination of mitophagy and  
756 mitochondrial biogenesis during ageing in *C. elegans*. *Nature.* 2015;521(7553):525-  
757 8.
- 758 85. Melber A, Haynes CM. UPR(mt) regulation and output: a stress response mediated  
759 by mitochondrial-nuclear communication. *Cell Res.* 2018;28(3):281-95.
- 760 86. Cooper JF, Machiela E, Dues DJ, Spielbauer KK, Senchuk MM, Van Raamsdonk  
761 JM. Activation of the mitochondrial unfolded protein response promotes longevity  
762 and dopamine neuron survival in Parkinson's disease models. *Scientific reports.*  
763 2017;7(1):16441-.

764 87. Martinez BA, Petersen DA, Gaeta AL, Stanley SP, Caldwell GA, Caldwell KA.  
765 Dysregulation of the Mitochondrial Unfolded Protein Response Induces Non-  
766 Apoptotic Dopaminergic Neurodegeneration in *C. elegans* Models of Parkinson's  
767 Disease. *The Journal of neuroscience : the official journal of the Society for*  
768 *Neuroscience*. 2017;37(46):11085-100.  
769  
770

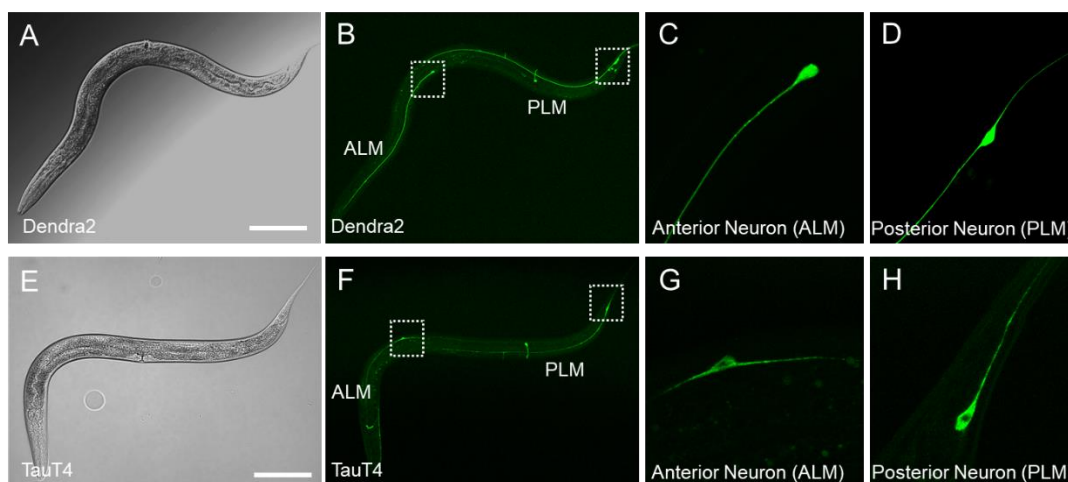

771

772 **Figure 1. Expression of Dendra2 and TauT4 from a single-copy transgene in *C.***  
773 ***elegans* touch neurons.** DIC (A, E) and confocal fluorescent images (B, C, D, F, G, and  
774 H) are shown of L4 larval worms expressing single-copy transgenes coding for Dendra2  
775 (B, C, D) or a Dendra2::TauT4 translational fusion (F, G, H). The transgenes are driven  
776 by the *mec-7* promoter in ALM(L/R) and PLM(L/R) neuron pairs, and also in AVM and  
777 PVM neurons, which are not considered further here. Panels C, G and D, H are  
778 magnifications of ALM and PLM respectively in the areas encompassed by the white  
779 boxes in panels B and F. Scale bars: 25  $\mu$ m. ALM is Anterior Lateral Microtubule and  
780 PLM is Posterior Lateral Microtubule cells, mechanosensory neurons that mediate  
781 behavioral responses to light touch to the body wall within the receptive fields defined by  
782 their projections.

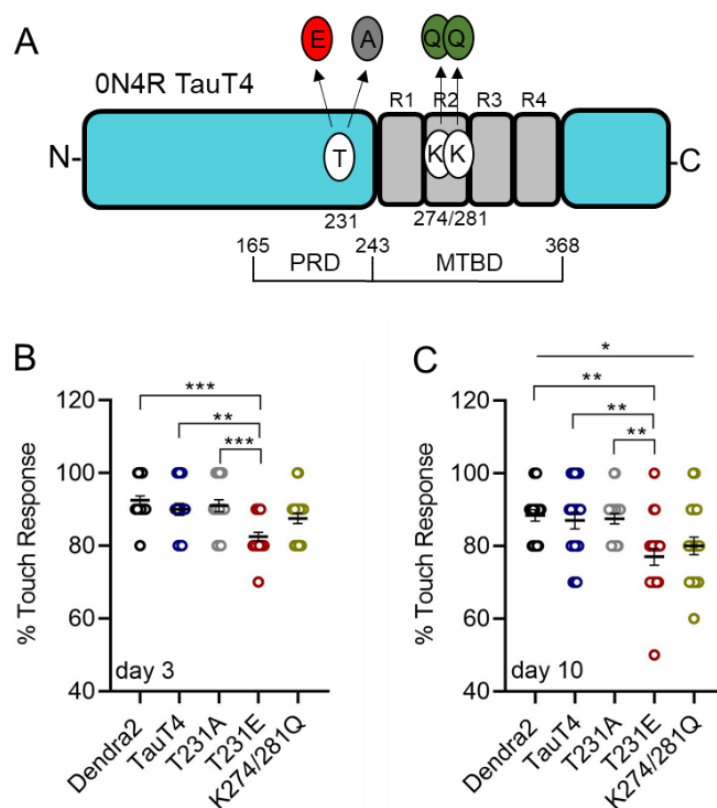

783

784 **Figure 2. Tau mutations mimicking posttranslational modifications to T231 and**  
785 **K274/281 impact touch sensitivity in a single-copy transgenic *C. elegans* model. A)**

786 Schematic of TauT4 protein, with the proline-rich domain (PRD), microtubule-binding  
787 domain (MTBD), and repeats R1-R4 denoted, along with individual amino acids that were  
788 mutated by CRISPR/Cas9 editing. The numbering scheme is based upon Tau-441, the  
789 longest of the alternatively spliced human brain isoforms, as is the convention in the field  
790 (i.e. T231 is not the 231<sup>st</sup> amino acid in the 0N4R tau variant, which lacks two N-terminal  
791 domains, but is instead positioned at amino acid 173). Touch sensitivity was quantified  
792 by measuring responsiveness to light touch in transgenic Dendra2, TauT4, T231A, T231E  
793 and K274/281Q mutant strains at day 3 (B) and at day 10 (C) of adulthood (d0 is when  
794 the worms enter their reproductive phase). Data were calculated as percent

795 responsiveness following ten repetitive light touches to the anterior body, and are plotted  
796 with the mean  $\pm$  SEM. Statistical analysis was by one-way ANOVA followed by Tukey's  
797 multiple-comparisons test (N = 20 animals), with  $*P<0.05$ ,  $**P<0.01$  and  $***P<0.001$   
798 denoting significance between bracketed samples. Each circular point represents a value  
799 obtained from a single animal – note that many of the points overlap.



800

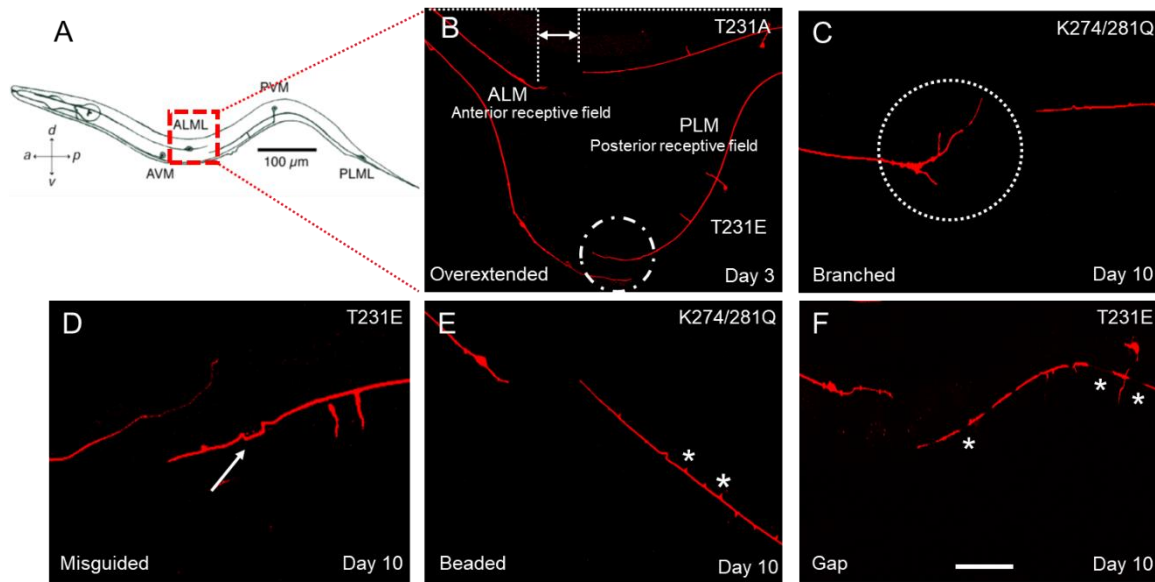

801

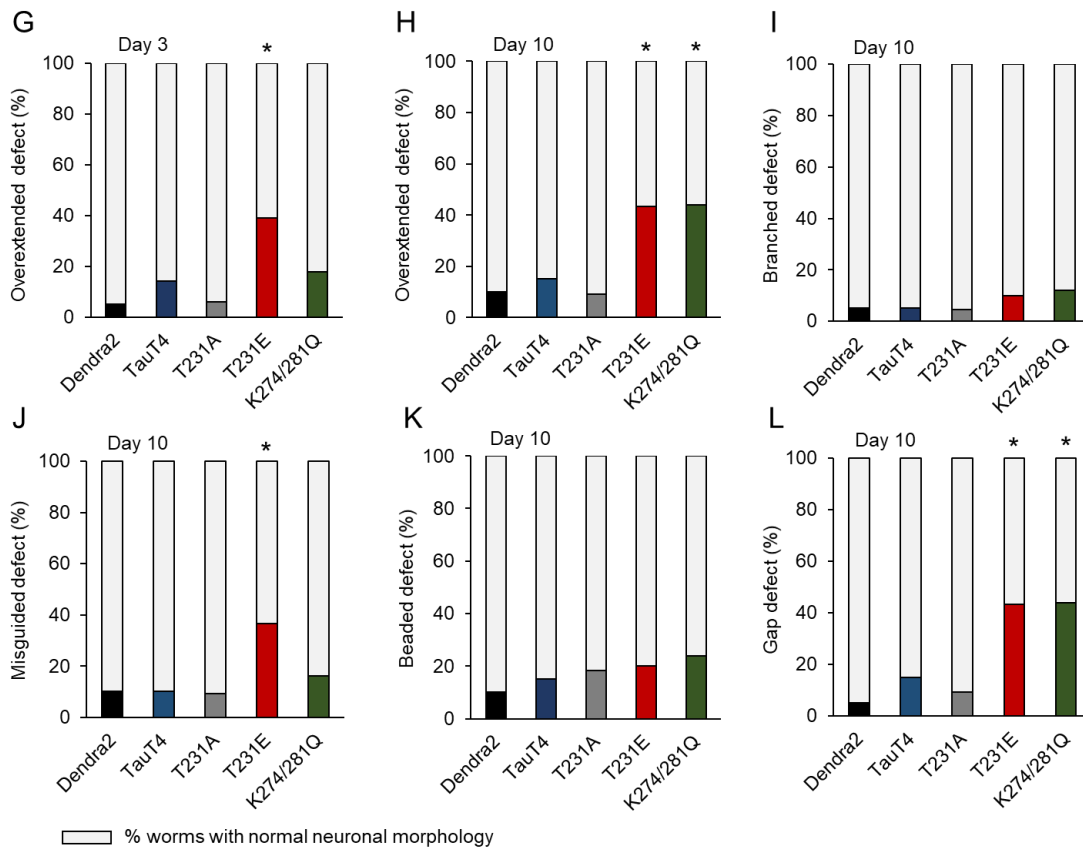

802

803 **Figure 3. Abnormal touch receptor neurite morphology in the PTM mutants. (A)**  
804 Schematic of a hermaphrodite animal. Mechanosensory neurons pairs ALM(R/L) and  
805 PLM(R/L) are present on both left and right sides of the animal, but only one of each pair  
806 is depicted. In wild type animals, neurites projecting from ALM and PLM do not overlap  
807 with each other, but instead divide the animal's body into two distinct receptive fields, as  
808 indicated (modified from 79). (B) Neurons were visualized using a *Pmec-4::mCherry*  
809 fluorescent reporter. Two animals lying side-by-side are shown here. The top animal is  
810 from the phospho-null strain (T231A) and the bottom animal is from the phospho mimetic  
811 strain (T231E). The normal separation between the ALM and PLM neurites, represented  
812 by the area between the dashed lines in T231A, is replaced by overlapping neurites in  
813 T231E, as demarcated by a dashed circle. (C-F) Representative images of specific  
814 neurite morphology defects observed in touch cells. White dashed circles denote  
815 branching in panel C, an arrow points to a misguided neurite in panel D, and white stars  
816 illustrate beads in panel E and gaps in panel F, respectively. The scale bar in panel F is  
817 10  $\mu$ m. (G-L) Quantification of the defects exemplified in panels B-F in Dendra2, TauT4,  
818 and T231A, T231E and K274/281Q. The colored bar denote the percentage of worms  
819 with the defect, while the gray bar denotes the percentage of worm that lack the defect.  
820 Statistical analysis was by Fisher's exact test followed by two-tailed correction, with  
821  $*P < 0.05$  compared to the Dendra2 control. Not all significant statistical comparisons are  
822 annotated, and data for the parental *Pmec-4::mCherry* reporter strain lacking tau  
823 transgenes, which is very similar to Dendra2, is not shown. N= 25  $\pm$  5 neurites from  
824 separate animals scored for each type of defect.

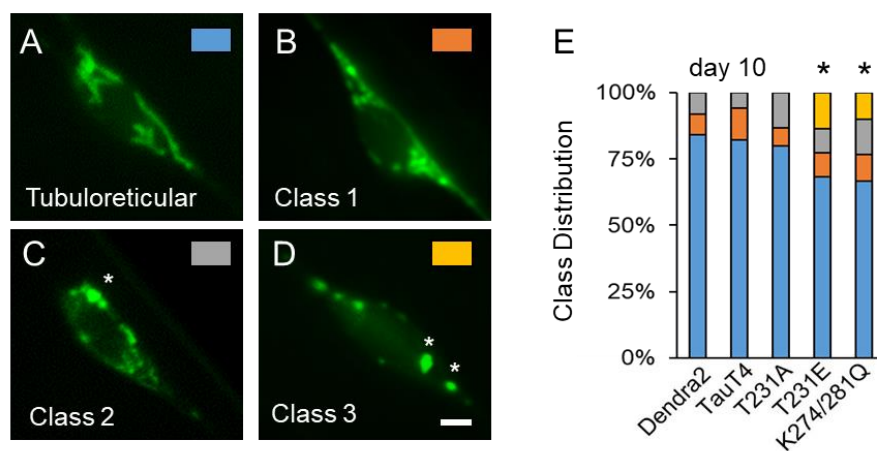

825

826 **Figure 4. Tau PTM mutants cause mitochondrial fragmentation.** (A-D)

827 Representative images of mitochondria from PLM neuron cell bodies showing different  
828 classes of fragmentation. Each panel is color-coded to the data in panel E, as indicated.

829 Asterisks denote overt swollen mitochondria resulting from excessive fragmentation.

830 Labeling was via mito-mKeima, imaged on a single channel specific for mitochondria. (E)

831 Data from day 10 adults presented in a more granular fashion, with individual cells

832 assigned a category as depicted in panels A-D.  $N = 30 \pm 5$  cells from separate animals.

833 Statistical analysis was by Wilcoxon signed-rank test, with  $*P < 0.05$  compared to Dendra2.

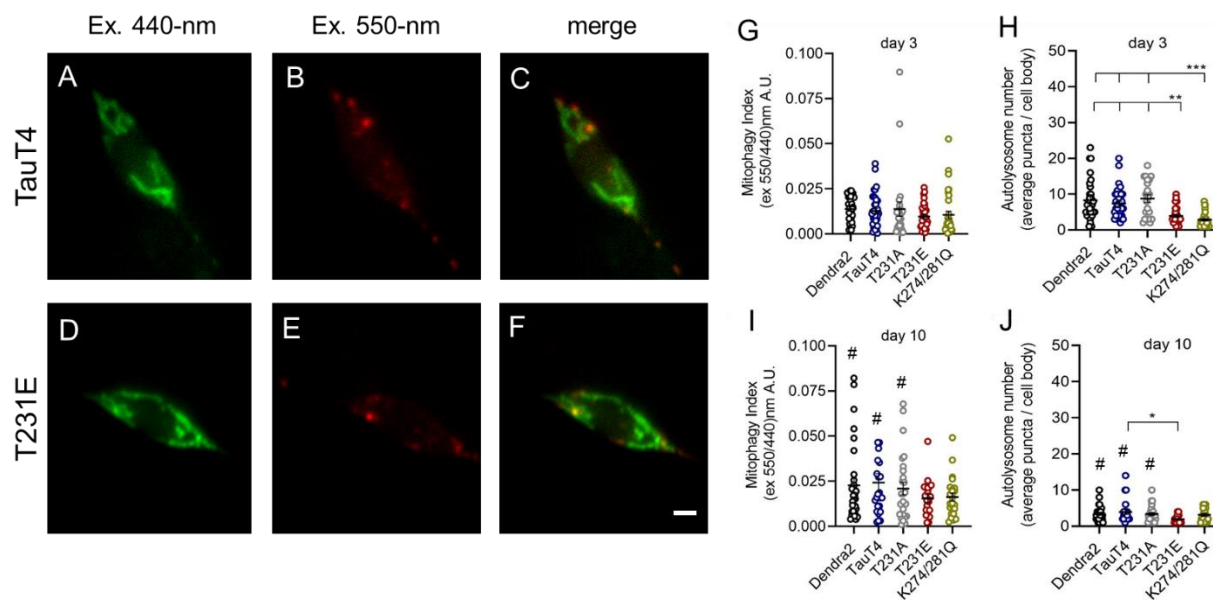

834

835 **Figure 5. Tau PTM mutants reduce the number of mitolysosomes, but not baseline**

836 **mitophagy.** (A-F) Representative fluorescent images from the PLM cell bodies

837 expressing single-copy TauT4 or T231E, together with the biosensor mito-mKeima.

838 Mitochondria at neutral pH have been pseudo-colored green, and organelles that have

839 been incorporated via mitophagy into acidic vesicles have been pseudo colored red.

840 Scale bars: 5 μm. (G, I) Background corrected 550-nm excitation / 600-nm emission

841 values were divided by 440-nm excitation / 600-nm emission values to obtain a mitophagy

842 index for PLM cell bodies from Dendra2, TauT4, and T231A, T231E, and K274/281Q

843 PTM mutants at day 3 and day 10 of adulthood. (H, J) Quantitative analysis of the number

844 of mitolysosomes containing mitochondria in the distal PLM cell bodies of day 3 and day

845 10 adult animals as a function of tau genotype, as indicated. Data are the mean ± SEM

846 from three independent technical replicates performed on different days. Individual data

847 points demarcate values from single PLM cells from separate animals (N = 35 ± 5).

848 Statistical analysis within day 3 and day 10 datasets was by one-way ANOVA with

849 Tukey's multiple comparison test, with \*\*\*  $P < 0.001$ , \*\*  $P < 0.01$ , \*  $P < 0.05$  when comparing  
850 bracketed samples. Comparisons between day 3 with day 10 data were limited to within  
851 a single genotype, and significance was determined by Student's t-test, with #  $P < 0.05$ .

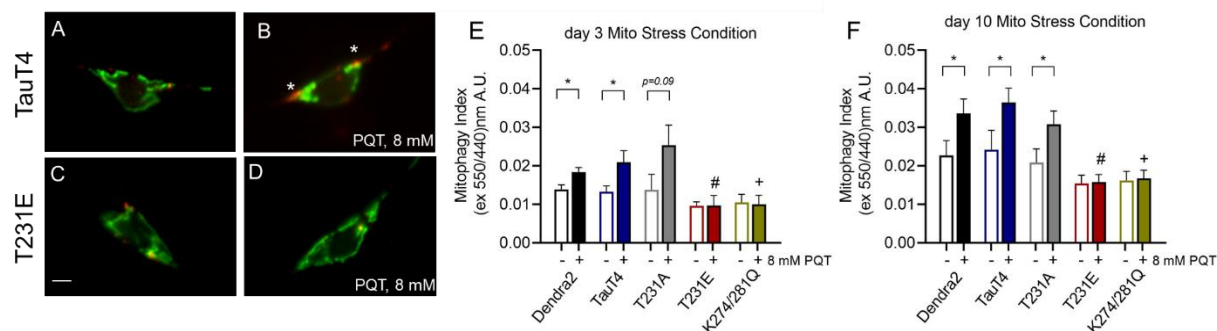

852

853 **Figure 6. Tau PTM mutants suppress paraquat-stimulated mitophagy.** mito-mKeima

854 was used to measure mitophagy in *C. elegans* PLM touch cells following an overnight

855 exposure to 8 mM PQT in Dendra2, TauT4, and PTM mutant strains. (A-D) are

856 representative merged images where 440-nm excitation was used to detect mitochondria

857 (green) and 550-nm excitation was used to detect mitolysosomes (red). Asterisks in panel

858 B point to mitolysosomes that are clearly more abundant following PQT treatment in

859 TauT4 animals. (E, F) Quantitative analysis of mitophagy in transgenic worms treated

860 with PQT (8 mM overnight) immediately prior to day 3 and day 10 of adulthood. Scale

861 bar: 5  $\mu$ m. Data are the mean  $\pm$  SEM from three independent technical replicates

862 performed on different days (N = 35  $\pm$  5 cells from separate animals). Statistical analysis

863 was by two-way ANOVA followed by Tukey's post hoc test, with \* $P < 0.05$  denoting

864 significance when comparing bracketed samples. #, + denotes  $P < 0.05$  between the

865 PQT-treated T231E or K274/281Q and Dendra2, respectively.

866
